# Supplementary material for: Competitive effects of salt and surfactant on the structure of nanoparticles in a binary system of nanoparticle and protein
Source: Royal Society of Chemistry journal article supplement (doi:10.1039/d3cp02619a), 2023-01-01
Supplement: d3cp02619a1.pdf [file d3cp02619a1.pdf]

## Supplementary Information

### Competitive effects of Salt and Surfactant on the Structure of Nanoparticles in the binary system of Nanoparticle and Protein

Debasish Saha,<sup>a,b</sup> Sugam Kumar,<sup>\*a,c</sup> Jitendra P. Mata,<sup>d</sup> Andrew E. Whitten<sup>d</sup> and Vinod K. Aswal<sup>\*a,c</sup>

<sup>a</sup>*Solid State Physics Division, Bhabha Atomic Research Centre, Mumbai 400 085, India.*

<sup>b</sup>*Juelich Centre for Neutron Science-4, Forschungszentrum Juelich, Juelich-52425, Germany*

<sup>c</sup>*Homi Bhabha National Institute, Mumbai 400 094, India*

<sup>d</sup>*Australian Centre for Neutron Scattering (ACNS), Australian Nuclear Science and Technology Organization (ANSTO), Lucas Heights, NSW 2234, Australia*

\*E-mail: [sugam@barc.gov.in](mailto:sugam@barc.gov.in); [vkaswal@barc.gov.in](mailto:vkaswal@barc.gov.in)

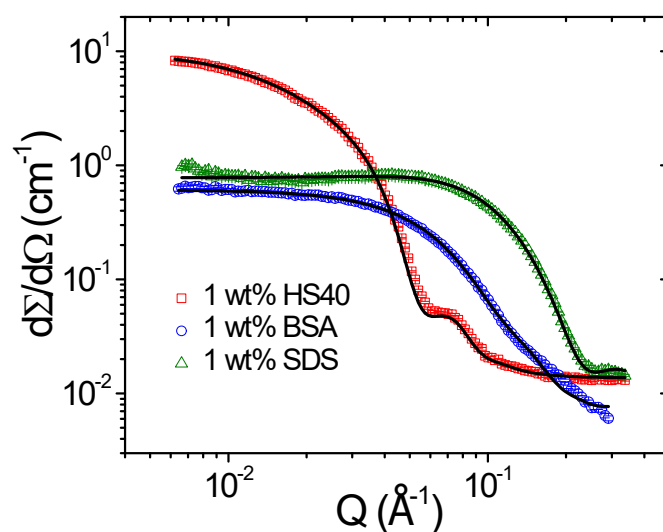

**Fig. S1** SANS data of the individual components of silica nanoparticles, BSA protein, and SDS surfactant in  $\text{D}_2\text{O}$  (1wt% each). Model fits from SASfit are overlaid on each as solid black lines.

**Table S1** Fitted structural parameters of 1 wt% HS40 nanoparticle, 1 wt% BSA and 1 wt% SDS in  $\text{D}_2\text{O}$ .

| System (1 wt%) | Semi-major axis (nm) | Semi-major axis (nm) | Charge | Model               |
|----------------|----------------------|----------------------|--------|---------------------|
| HS40           | 8.0                  | 8.0                  | -      | Spherical           |
| BSA            | 4.2                  | 1.4                  | -      | Oblate ellipsoidal  |
| SDS            | 2.7                  | 1.6                  | 23     | Prolate ellipsoidal |

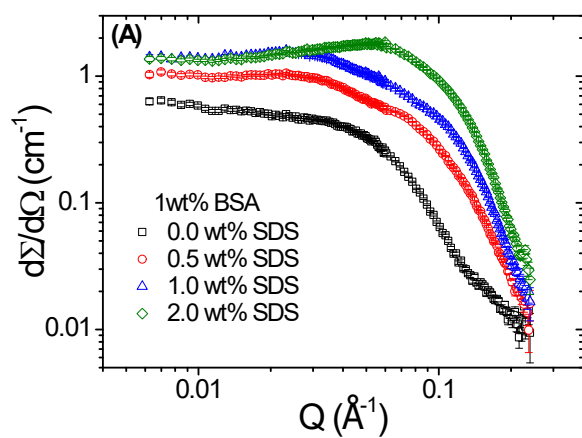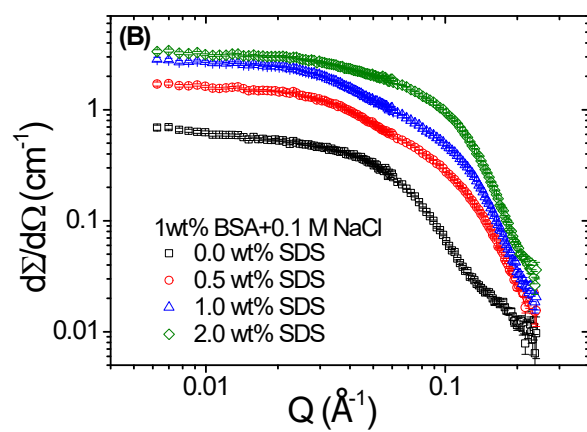

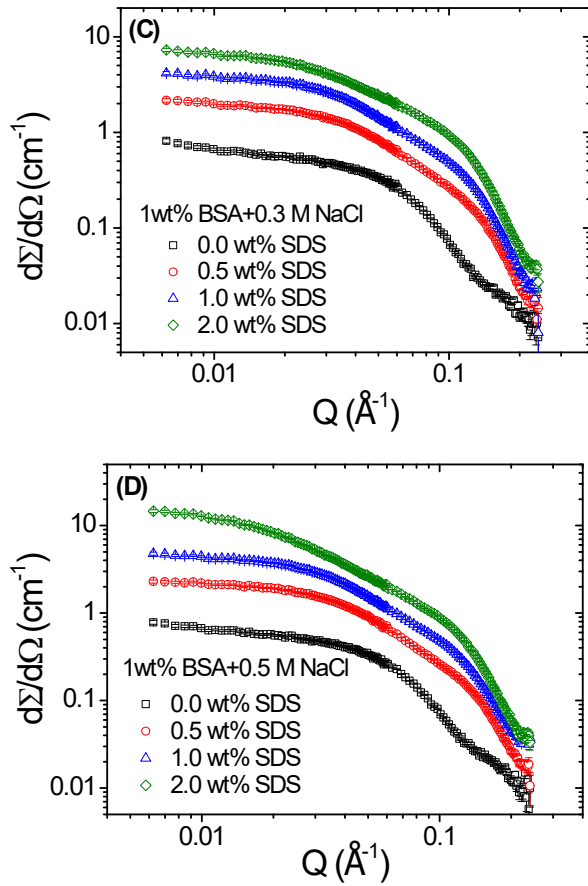

**Fig. S2** SANS data of 1wt% BSA protein + 0-2.0 wt% SDS at in presence of varying concentrations of NaCl (A) 0 M NaCl (B) 0.1 M NaCl (C) 0.3 M NaCl (D) 0.5 M NaCl. SANS data of BSA-SDS in the presence of salt shows clear signatures of beads-on-a-string model.

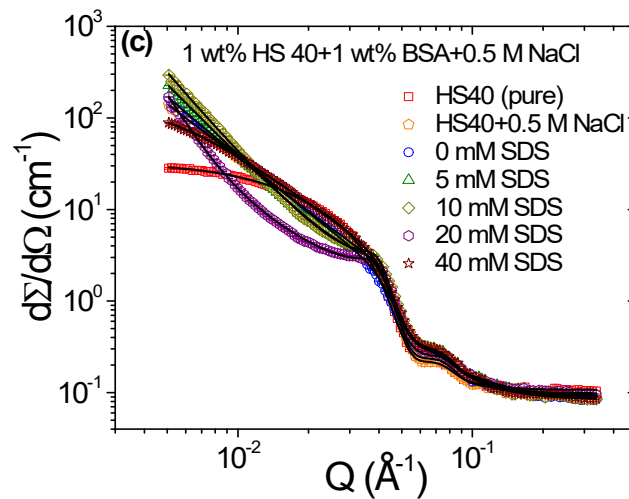

**Fig. S3** SANS data of the 1 wt% Hs40 + 1 wt% BSA+ 0.5 M NaCl in presence of varying concentrations of SDS.

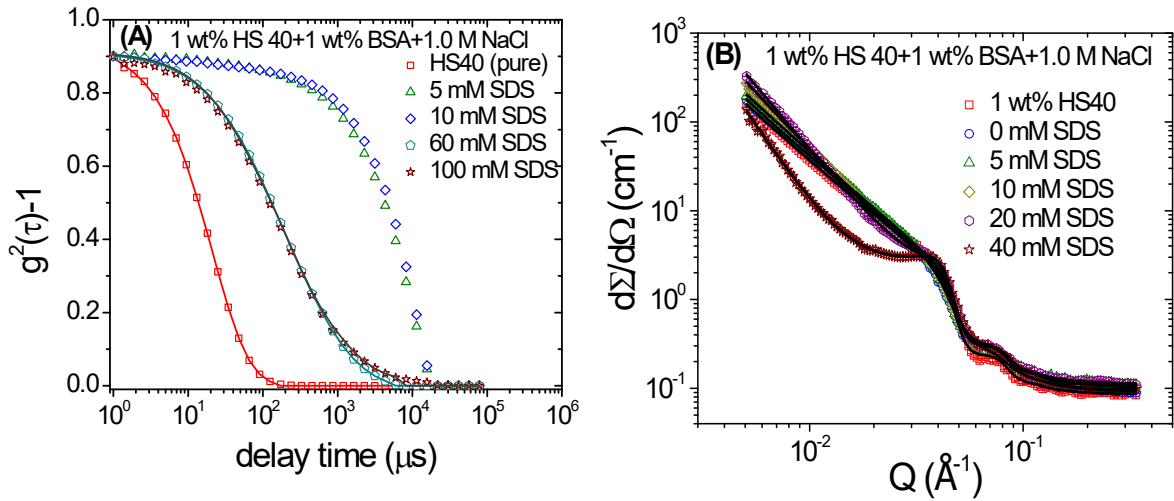

**Fig. S4** (A) DLS and (B) SANS data of 1wt% HS40 silica nanoparticles + 1wt% BSA protein + 1.0 M NaCl in presence of varying concentrations of SDS.

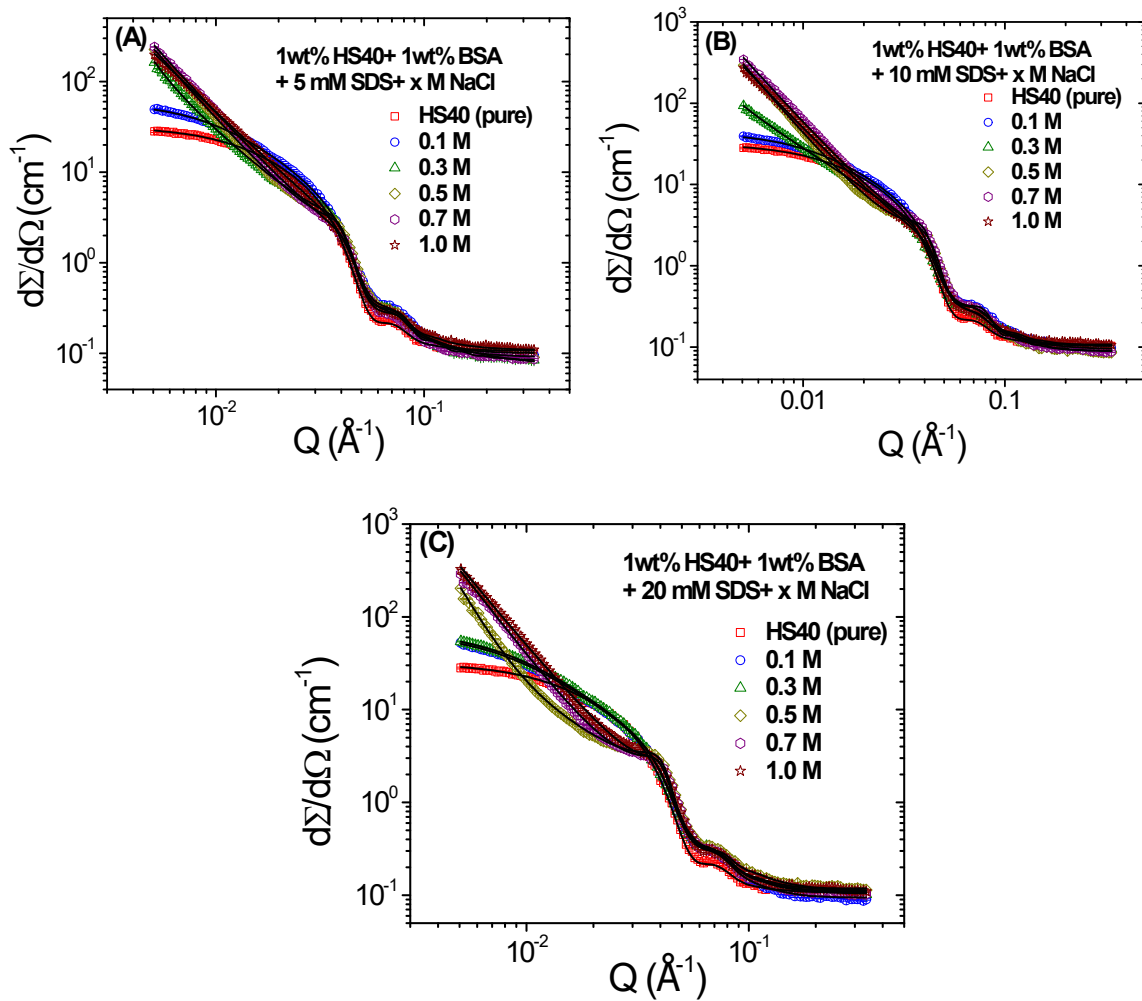

**Fig. S5** SANS data of three-component system of 1wt% HS40 silica nanoparticles+1wt% BSA protein+ 0-1.0 M NaCl in presence of varying SDS concentrations (A) 5 mM SDS (B) 10 mM SDS (C) 20 mM SDS.
